# Supplementary material for: Oxidative Stress-Mediated Antibacterial Activity of the Total Flavonoid Extracted from the Agrimonia pilosa Ledeb. in Methicillin-Resistant Staphylococcusaureus (MRSA)
Source: MDPI journal article supplement (doi:10.3390/vetsci9020071), 2022-02-07
Supplement: s1 [file s1]

## Article

# Oxidative Stress-Mediated Antibacterial Activity of the Total Flavonoid Extracted from the *Agrimonia pilosa* Ledeb. in Methicillin-Resistant *Staphylococcus aureus* (MRSA)

Liren He <sup>1</sup>, Han Cheng <sup>1</sup>, Fuxin Chen <sup>2</sup>, Suquan Song <sup>1</sup>, Hang Zhang <sup>3</sup>, Weidong Sun <sup>1</sup>, Xiaowei Bao <sup>4</sup>, Haibin Zhang <sup>1</sup> and Chenghua He <sup>1,\*</sup>

<sup>1</sup> College of Veterinary Medicine, Nanjing Agricultural University, Nanjing 210095, China; 2019107090@njau.edu.cn (L.H.); chenghan@stu.njau.edu.cn (H.C.); suquan.song@njau.edu.cn (S.S.); swd100@njau.edu.cn (W.S.); haibinzhang@njau.edu.cn (H.Z.)

<sup>2</sup> School of Chemistry and Chemical Engineering, Xi'an University of Science and Technology, Xi'an 710054, China; chenfuxin@xust.edu.cn

<sup>3</sup> Key Laboratory of Advanced Drug Preparation Technologies, Ministry of Education, Co-Innovation Center of Henan Province for New Drug R & D and Preclinical Safety, School of Pharmaceutical Sciences, Zhengzhou University, Zhengzhou 450001, China; hangzhang@zzu.edu.cn

<sup>4</sup> College of Food Science and Pharmacy, Xinjiang Agricultural University, Urumqi 830052, China; xiaoweibao0723@xjau.edu.cn

\* Correspondence: hechenghua@njau.edu.cn; Tel.: +86-025-8439-5227; Fax: +86-025-8439-8669

## Supplementary Materials

**Table S1.** The list of flavonoid compounds extracted from the *A. pilosa* Ledeb.

| Peak | Parent ion | MS/MS                                            | Error (ppm) | Mol. formula                                    | Proposed compound                 |
|------|------------|--------------------------------------------------|-------------|-------------------------------------------------|-----------------------------------|
| 1    | 271.0601   | 158.0122                                         | 1.366       | C <sub>15</sub> H <sub>10</sub> O <sub>5</sub>  | apigenin                          |
| 2    | 285.0395   | 229.0506, 151.0037                               | -3.132      | C <sub>15</sub> H <sub>10</sub> O <sub>6</sub>  | kaempferol                        |
| 3    | 287.0586   | 289.0596, 288.0582, 153.0167, 135.0424           | -0.552      | C <sub>15</sub> H <sub>10</sub> O <sub>6</sub>  | luteolin                          |
| 4    | 301.0363   | 273.0413, 255.0304, 227.0363, 125.0242,          | 2.668       | C <sub>15</sub> H <sub>12</sub> O <sub>7</sub>  | taxifolin                         |
| 5    | 303.0499   | 301.0347, 273.0417, 302.0432                     | 1.547       | C <sub>15</sub> H <sub>10</sub> O <sub>7</sub>  | quercetin                         |
| 6    | 431.1055   | 117.0341, 283.0633, 161.0241, 135.0437, 121.0288 | -2.987      | C <sub>21</sub> H <sub>20</sub> O <sub>10</sub> | vitexin                           |
| 7    | 449.1078   | 287.0553, 288.0586, 289.0614, 451.1134           | 0.658       | C <sub>21</sub> H <sub>20</sub> O <sub>11</sub> | kaempferol-3- <i>O</i> -glucoside |
| 8    | 465.1028   | 303.0495, 304.0535, 301.0342, 305.0544           | 3.374       | C <sub>21</sub> H <sub>20</sub> O <sub>12</sub> | isoquercetin                      |
| 9    | 593.1353   | 594.1394, 595.1412, 285.0425                     | 4.636       | C <sub>30</sub> H <sub>26</sub> O <sub>13</sub> | tiliroside                        |
| 10   | 610.1508   | 300.0263, 299.0184, 270.0162                     | 1.517       | C <sub>27</sub> H <sub>30</sub> O <sub>16</sub> | Rutin                             |

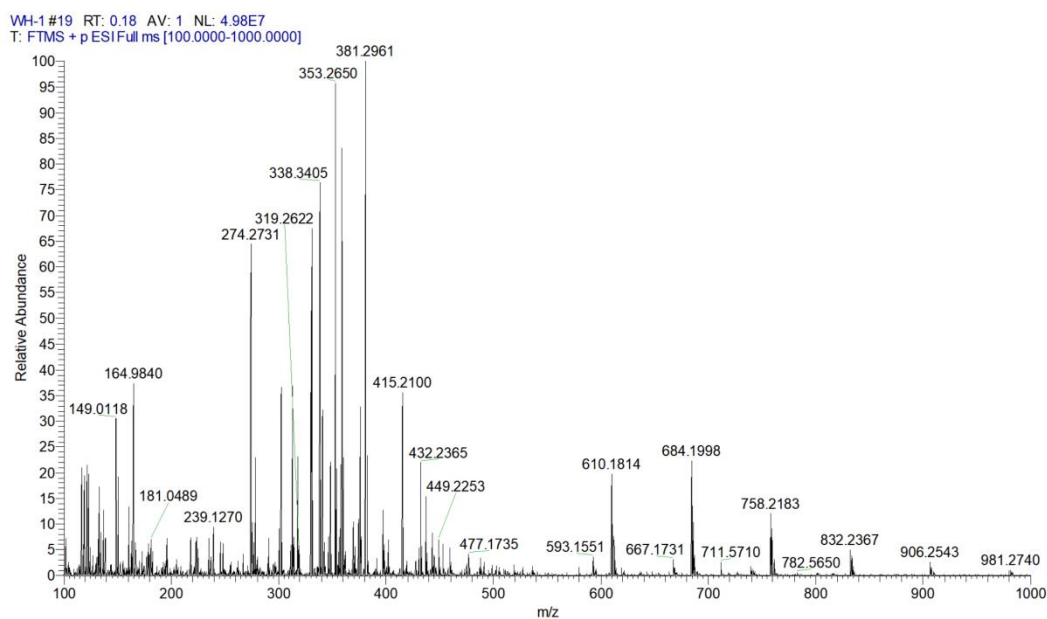

**Figure S1.** The total ion chromatogram of total flavonoid extracted from the *A. pilosa* Ledeb.

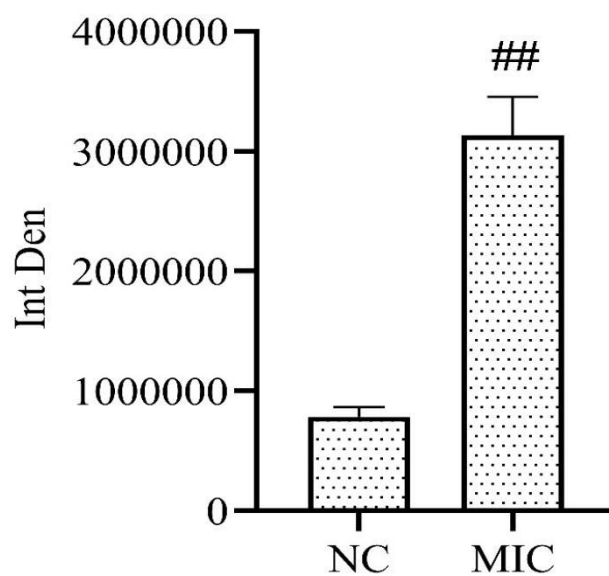

**Figure S2.** The fluorescence intensity of intracellular ROS in MRSA ATCC43300 analyzed by the Image J software. ## means  $p$ -value < 0.01.

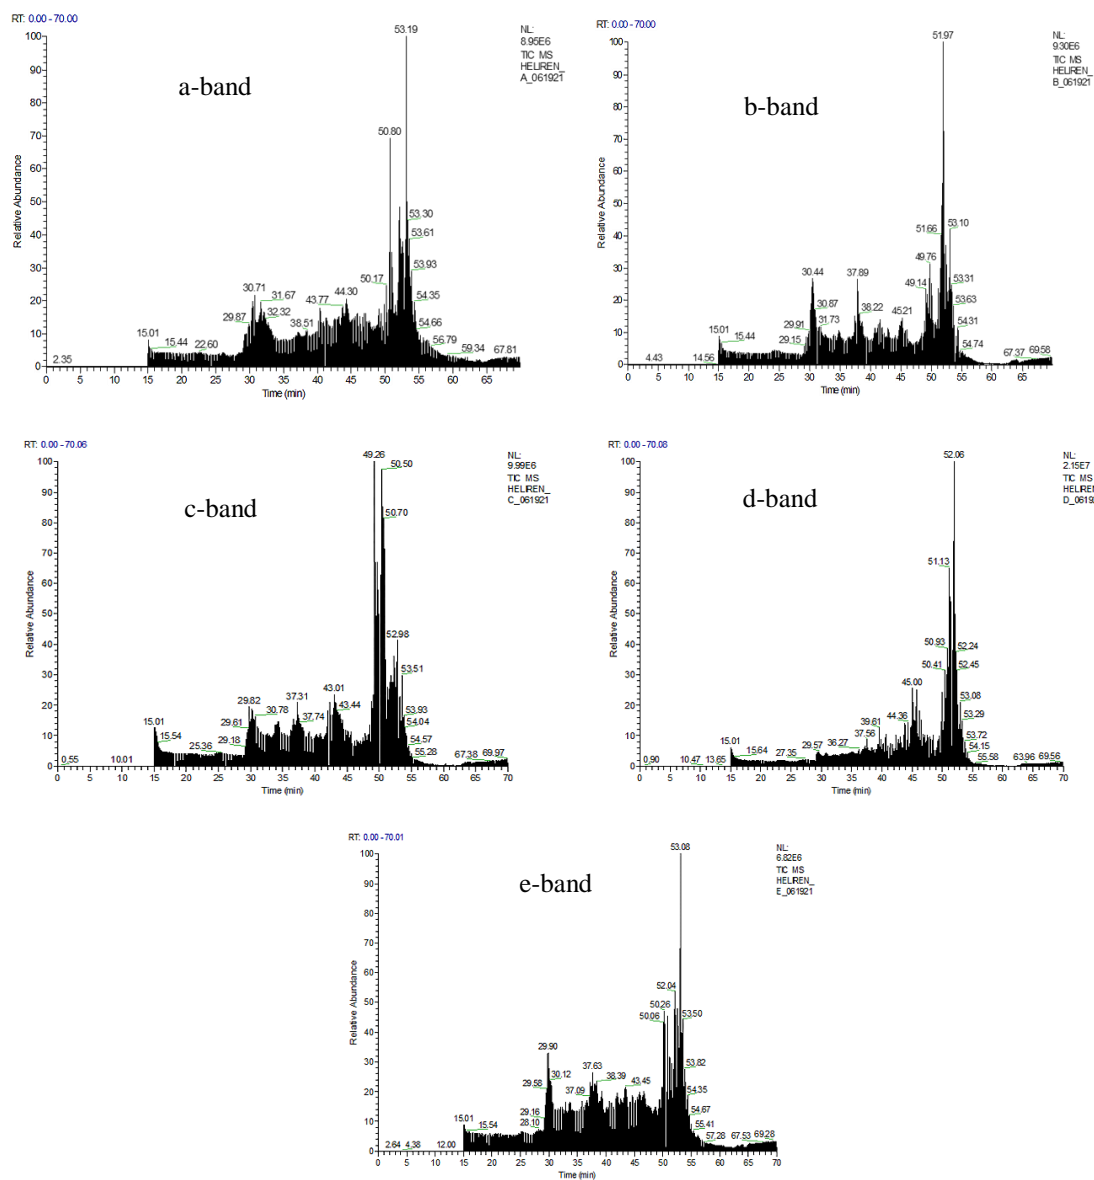

**Figure S3.** The total ion chromatogram of the a-band, b-band, c-band, d-band and e-band cut from the SDS-PAGE.

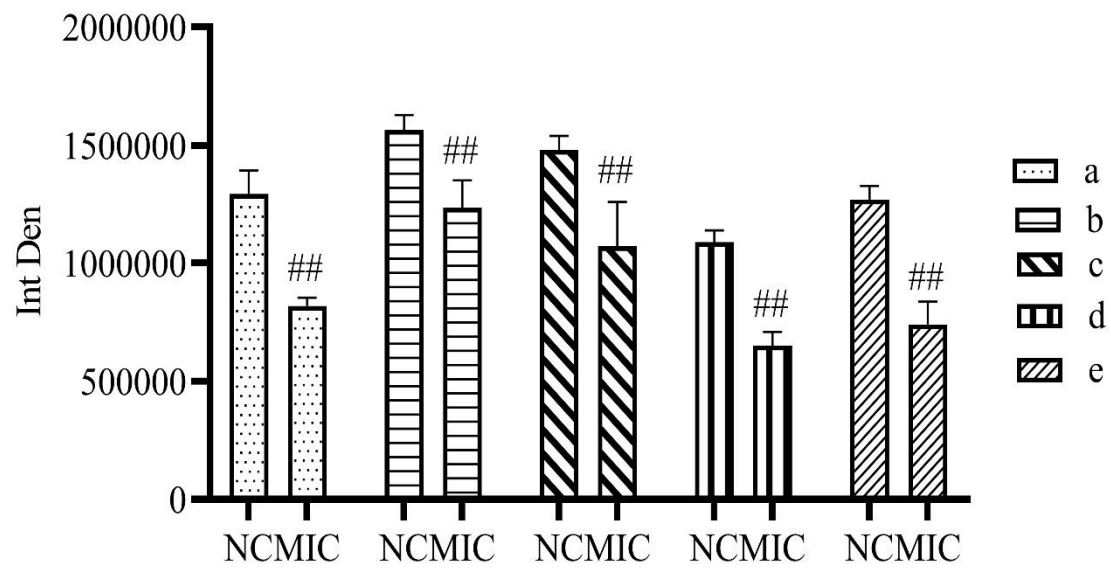

**Figure S4.** The densitometry analysis of a-band, b-band, c-band, d-band and e-band by the Image J software. ## means  $p$ -value  $< 0.01$ .
